# Supplementary material for: Synthesis of dihydrodehydrodiconiferyl alcohol: the revised structure of lawsonicin
Source: Royal Society of Chemistry journal article supplement (doi:10.1039/b918179b), 2009-11-03

**Synthesis of dihydrodehydrodiconiferyl alcohol: the revised structure of lawsonicin.**

Junxiu Meng,<sup>a,b</sup> Tao Jiang,<sup>b</sup> Huma Aslam Bhatti,<sup>c</sup> Bina S. Siddiqui,<sup>c</sup> Sally Dixon,<sup>\*a</sup>  
and Jeremy D. Kilburn <sup>\*a</sup>

<sup>a</sup> School of Chemistry, University of Southampton, Southampton, U.K. SO17 1BJ.

<sup>b</sup> Key Laboratory of Marine Drugs, Ministry of Education of China, School of Pharmacy, Ocean University of  
China, Qingdao 266003, China.

<sup>c</sup> H.E.J Research Institute of Chemistry, International Centre for Chemical Sciences, University of Karachi, Karachi-  
75270, Pakistan.

CONTENTS.

|                                                                                 |     |
|---------------------------------------------------------------------------------|-----|
| 1. <sup>13</sup> C NMR spectrum for compound <b>8</b> .....                     | S2  |
| 2. <sup>13</sup> C NMR spectrum for compound <b>10</b> .....                    | S3  |
| 3. <sup>13</sup> C NMR spectrum for compound <b>11</b> .....                    | S4  |
| 4. <sup>13</sup> C NMR spectrum for compound <b>17</b> .....                    | S5  |
| 5. <sup>13</sup> C NMR spectrum for compound <b>18</b> .....                    | S6  |
| 6. <sup>13</sup> C NMR spectrum for compound <b>19</b> .....                    | S7  |
| 7. <sup>13</sup> C NMR spectrum for compound <b>12</b> .....                    | S8  |
| 8. <sup>13</sup> C NMR spectrum for compound <b>13</b> .....                    | S9  |
| 9. <sup>13</sup> C NMR spectrum for compound <i>rac-cis-14</i> .....            | S10 |
| 10. <sup>13</sup> C NMR spectrum for compound <i>rac-trans-14</i> .....         | S11 |
| 11. <sup>13</sup> C NMR spectrum for compound <b>16</b> .....                   | S12 |
| 12. <sup>13</sup> C NMR spectrum for compound <b>20</b> .....                   | S13 |
| 13. <sup>13</sup> C NMR spectrum for compound <b>2</b> .....                    | S14 |
| 14. <sup>13</sup> C NMR spectrum for isolated natural product ‘lawsonicin’..... | S15 |

$^{13}\text{C}$  NMR (100.5 MHz,  $\text{CDCl}_3$ ) for:

*rac*-3-{4-[2,3-*trans*]-3-(Hydroxymethyl)-2,3-dihydro-1-benzofuran-2-yl]-2-methoxyphenyl}propan-1-ol (**8**)

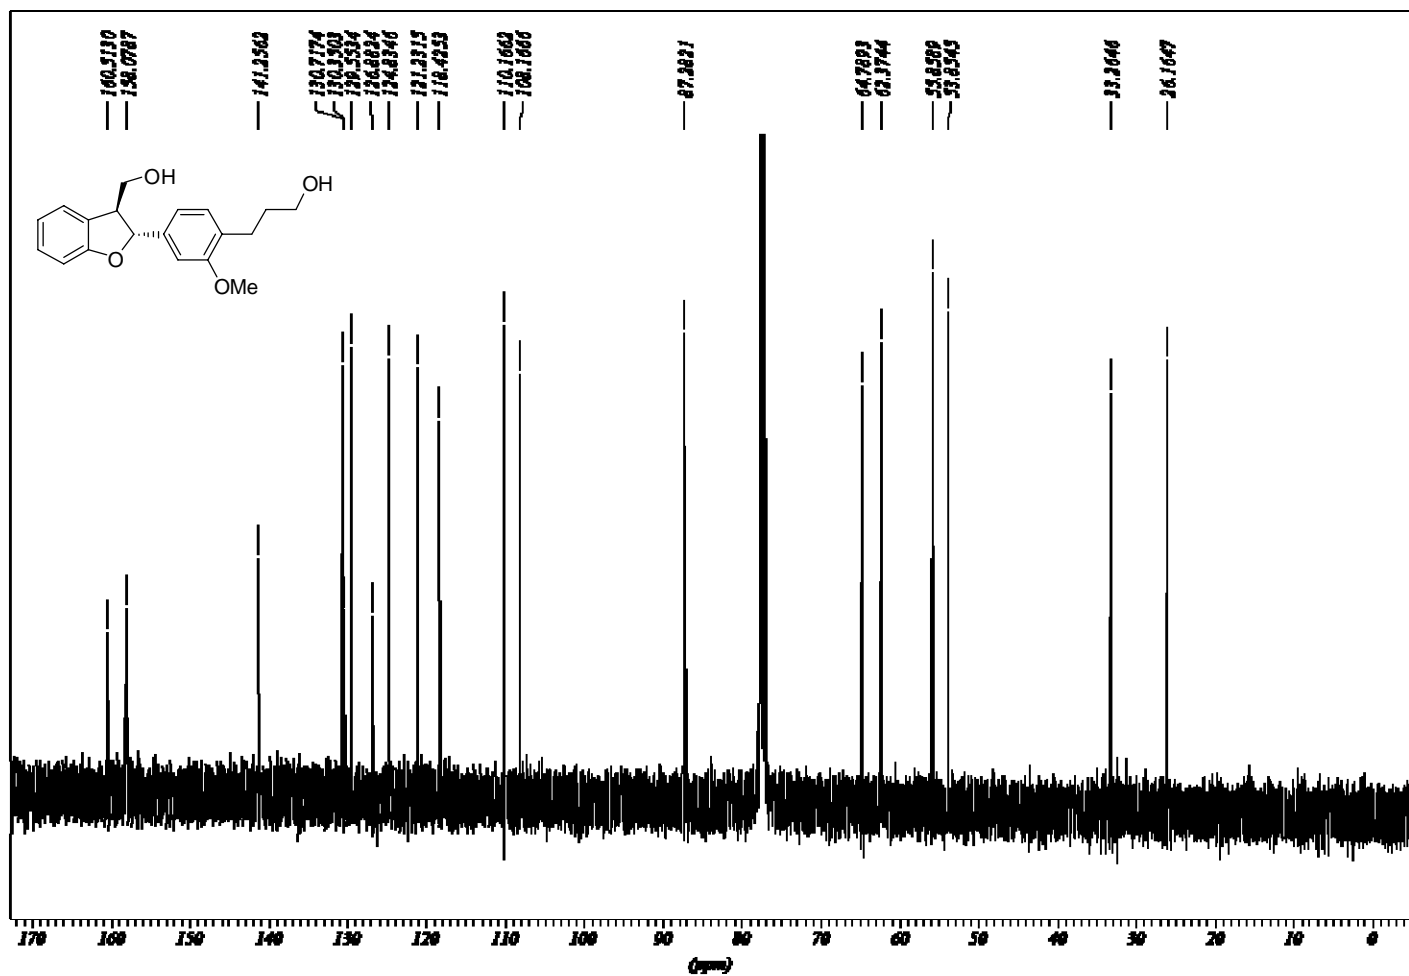

$^{13}\text{C}$  NMR (75 MHz,  $\text{CDCl}_3$ ) for:  
1-(Benzyloxy)-4-(iodomethyl)-2-methoxybenzene (**10**)

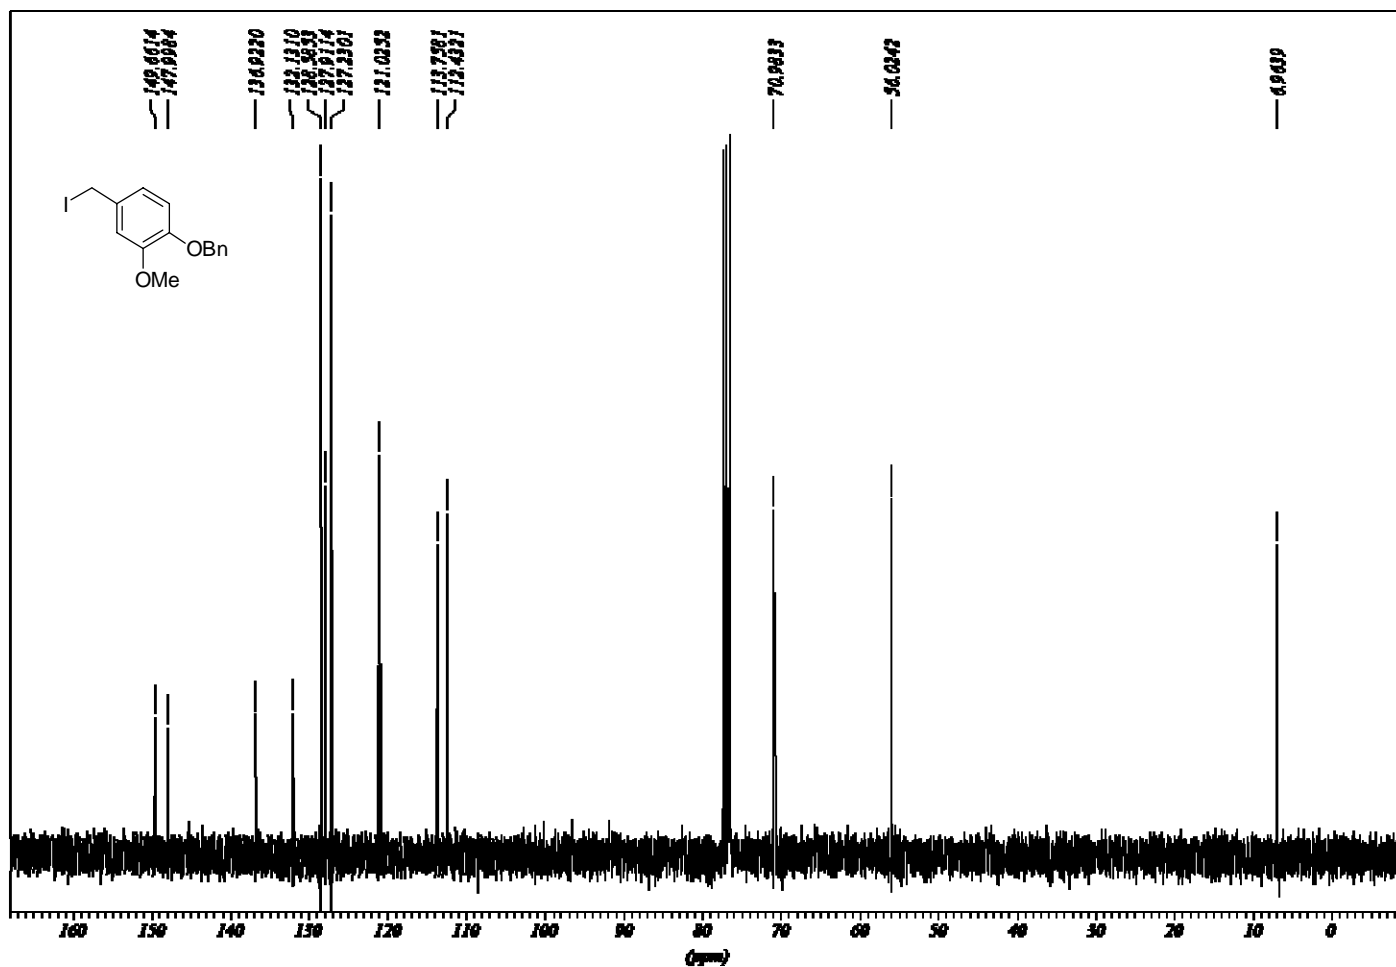

$^{13}\text{C}$  NMR (100.5 MHz,  $\text{CDCl}_3$ ) for:

2-{{4-(Benzyloxy)-3-methoxybenzyl}oxy}-5-bromo-3-methoxybenzaldehyde (**11**)

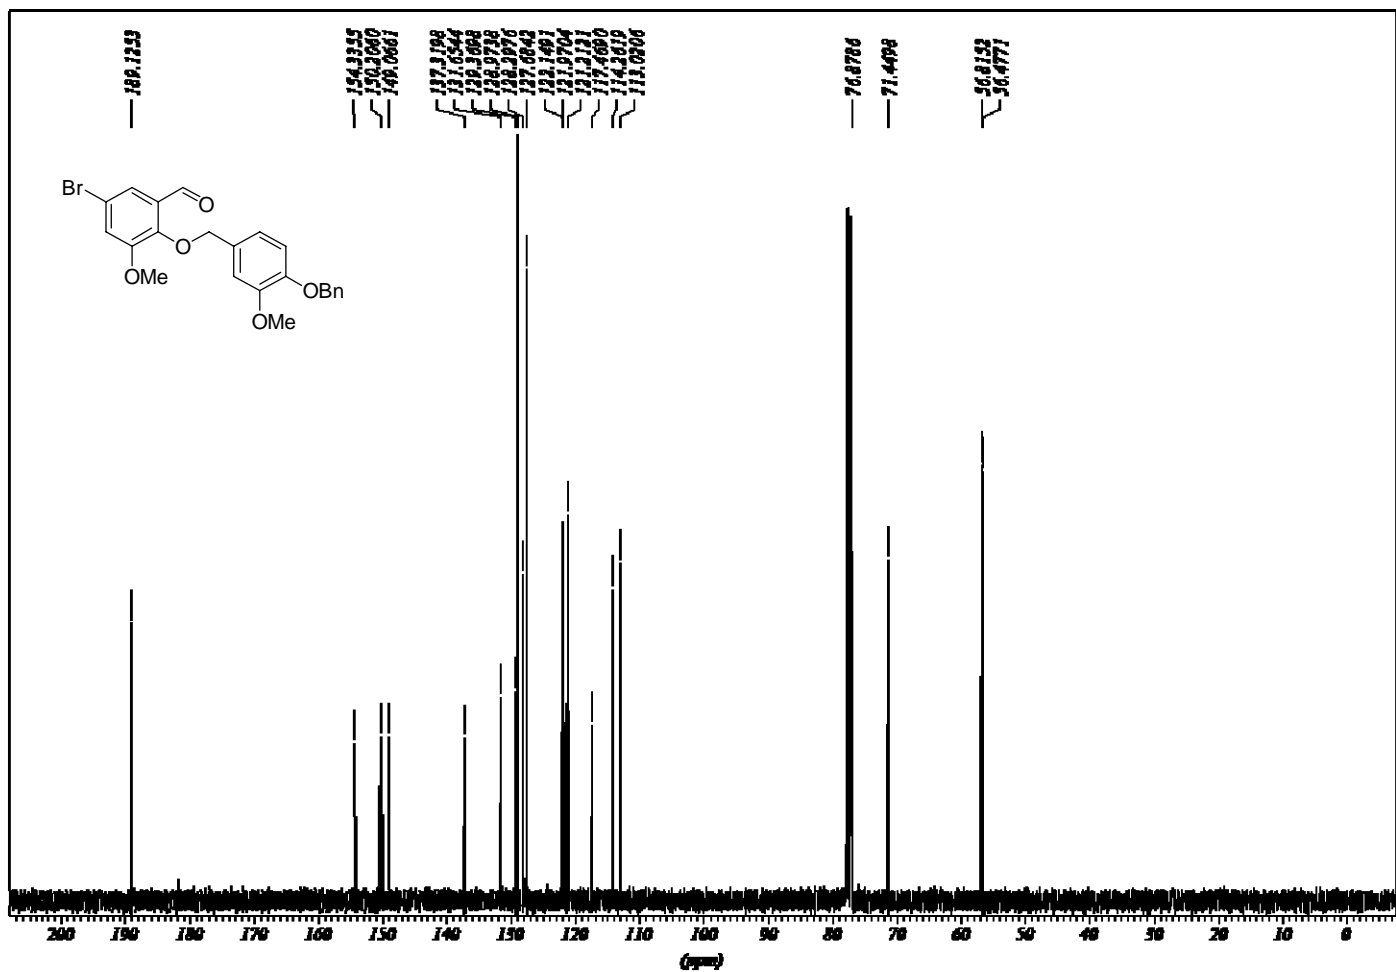



$^{13}\text{C}$  NMR (100.5 MHz,  $\text{CDCl}_3$ ) for:

2-{2-[4-(Benzyloxy)-3-methoxybenzyloxy]-5-bromo-3-methoxyphenyl}acetaldehyde (**18**)

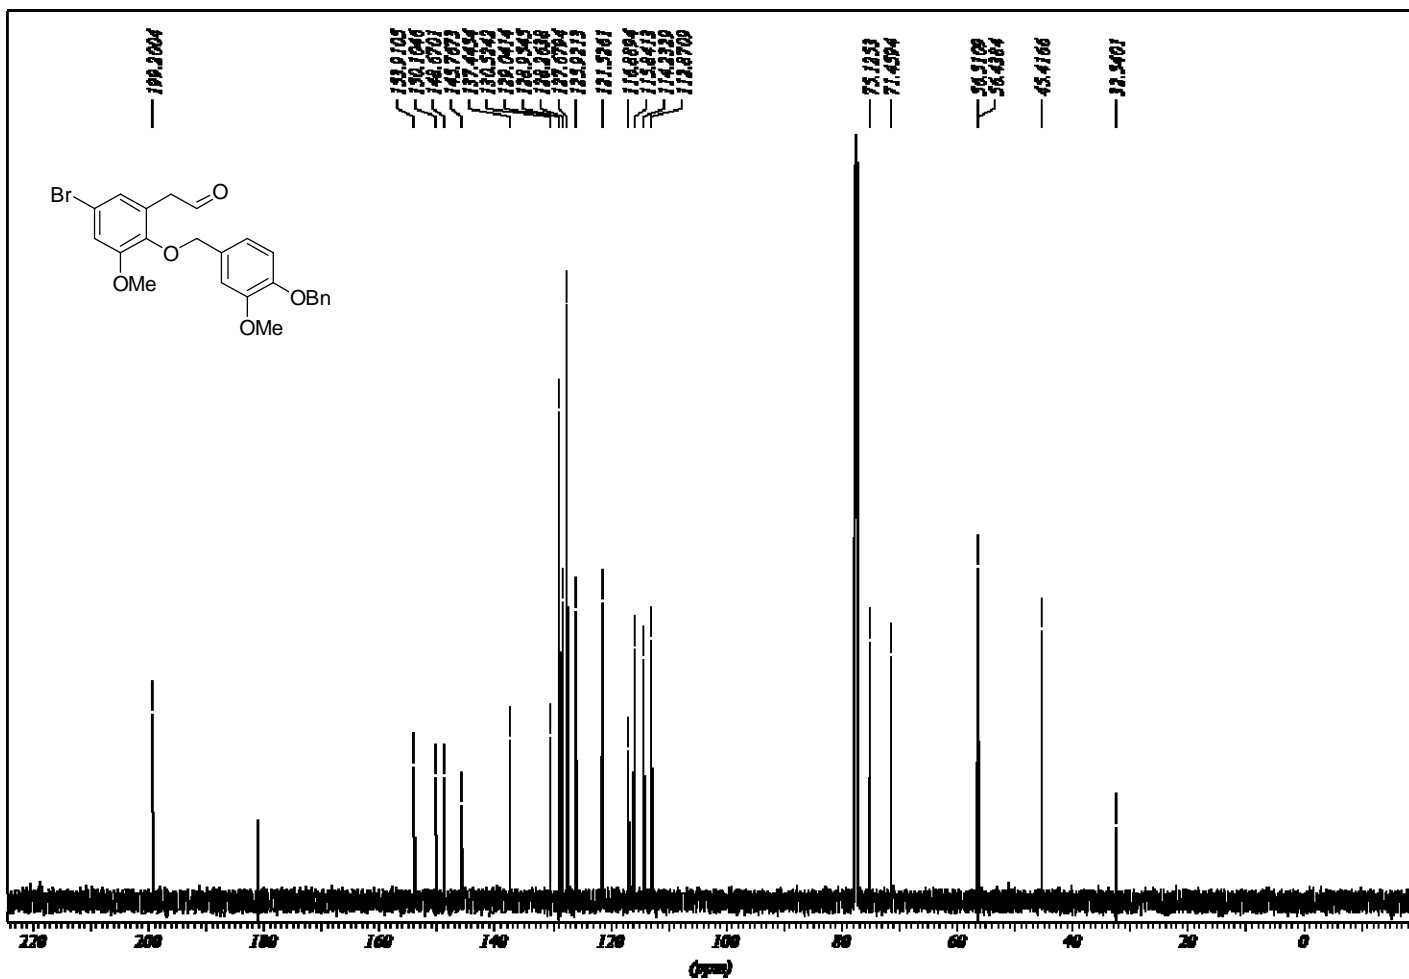

$^{13}\text{C}$  NMR (100.5 MHz,  $\text{CDCl}_3$ ) for:

2-[2-[4-(Benzyloxy)-3-methoxybenzyloxy]-5-bromo-3-methoxyphenyl]acetic acid (**19**)

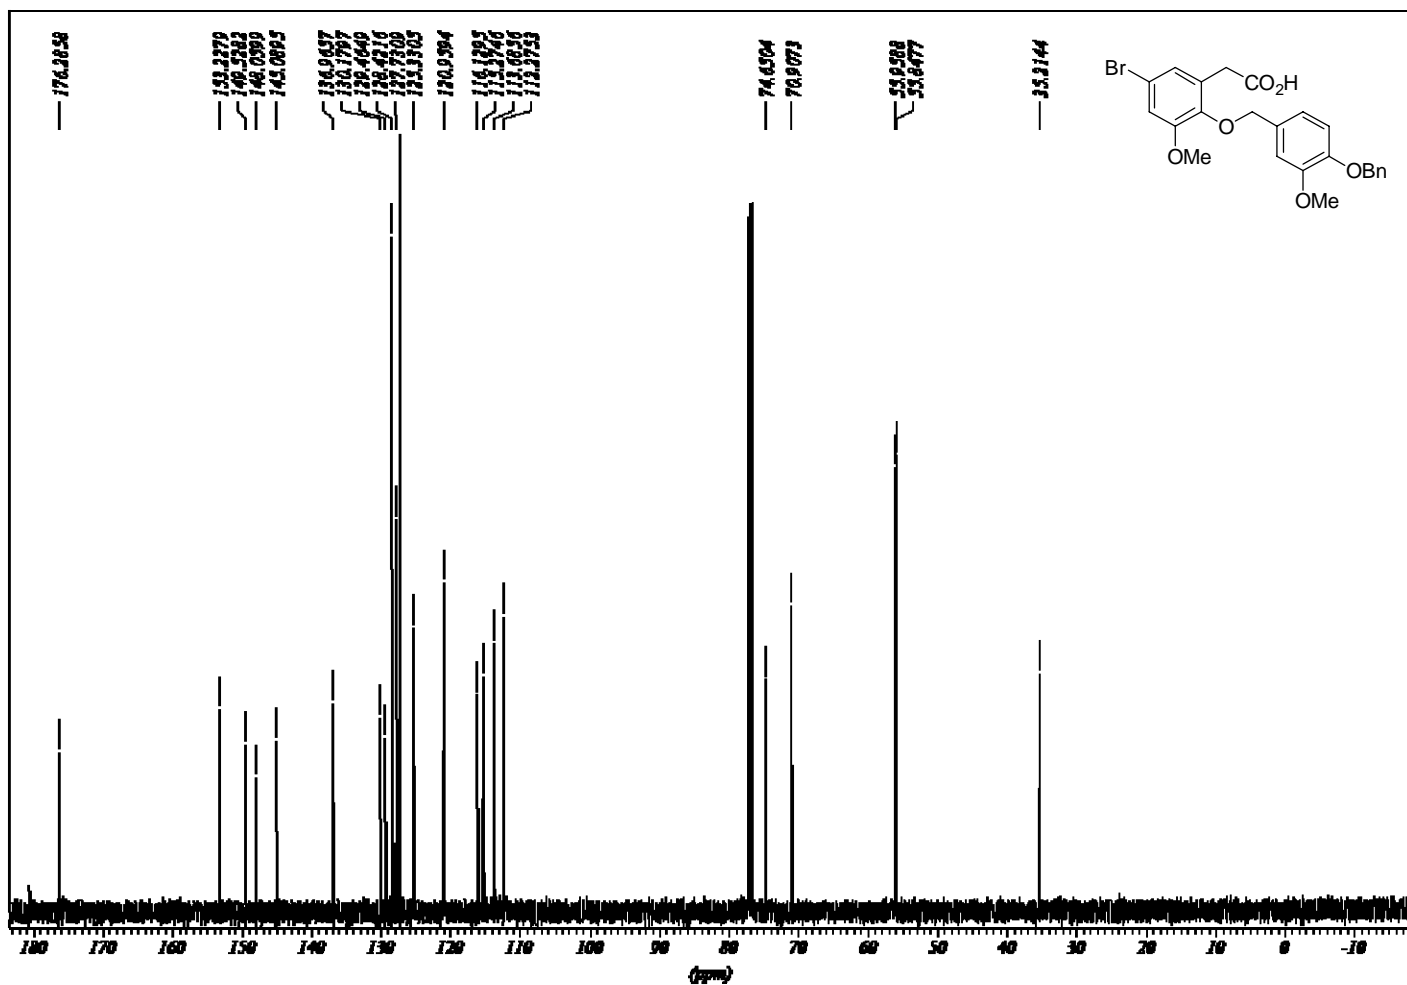

$^{13}\text{C}$  NMR (100.5 MHz,  $\text{CDCl}_3$ ) for:

2-{2-[4-(Benzyloxy)-3-methoxybenzyloxy]-5-bromo-3-methoxyphenyl}acetate (**12**)

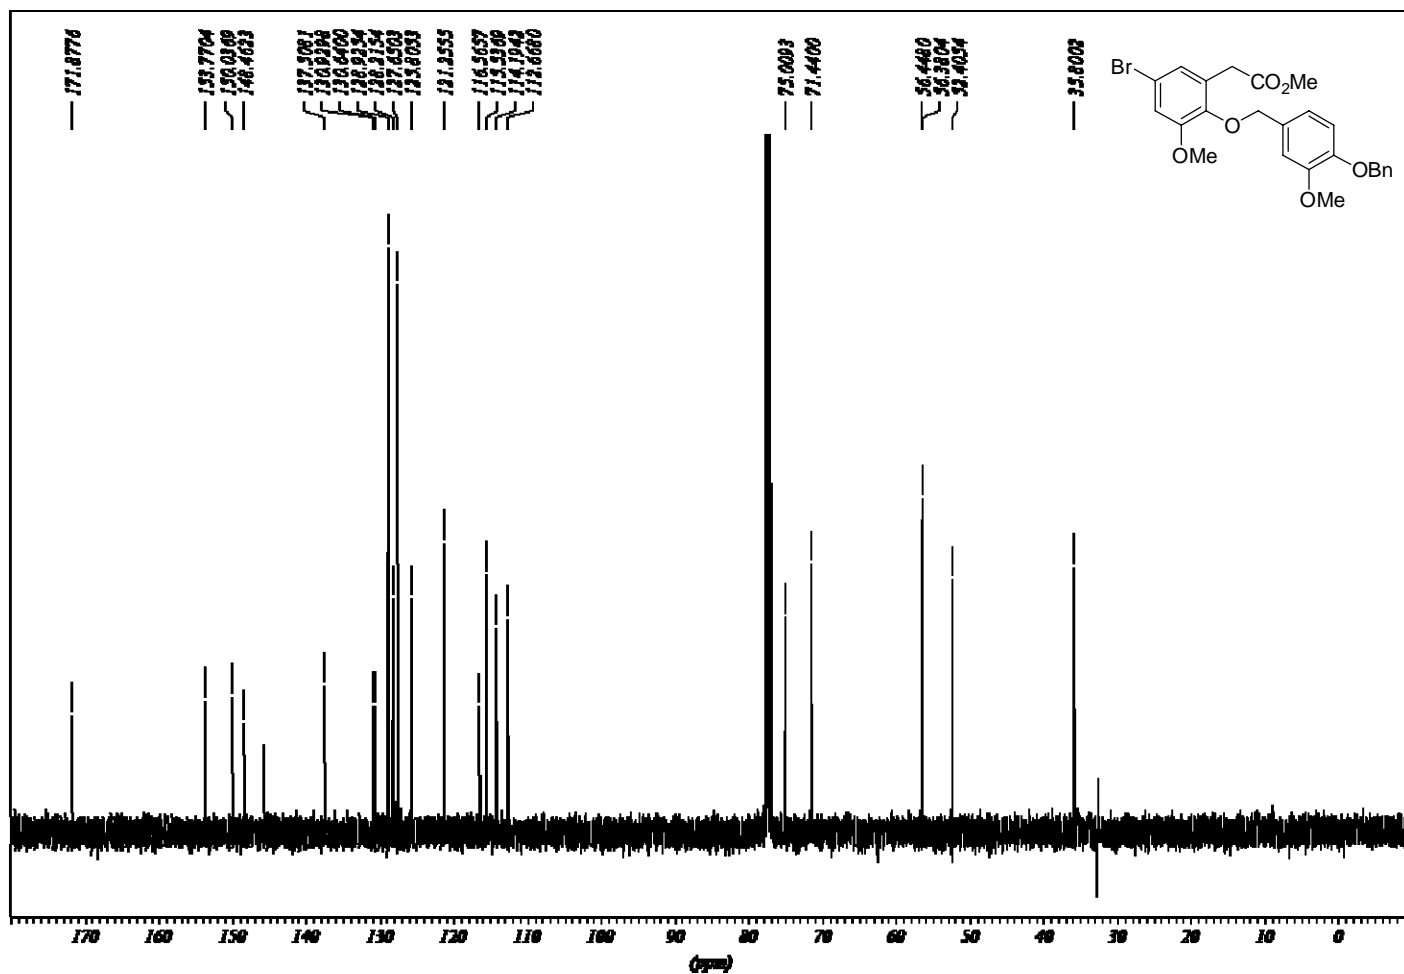



$^{13}\text{C}$  NMR (100.5 MHz,  $\text{CDCl}_3$ ) for:  $\alpha$ -Diazoester **13**

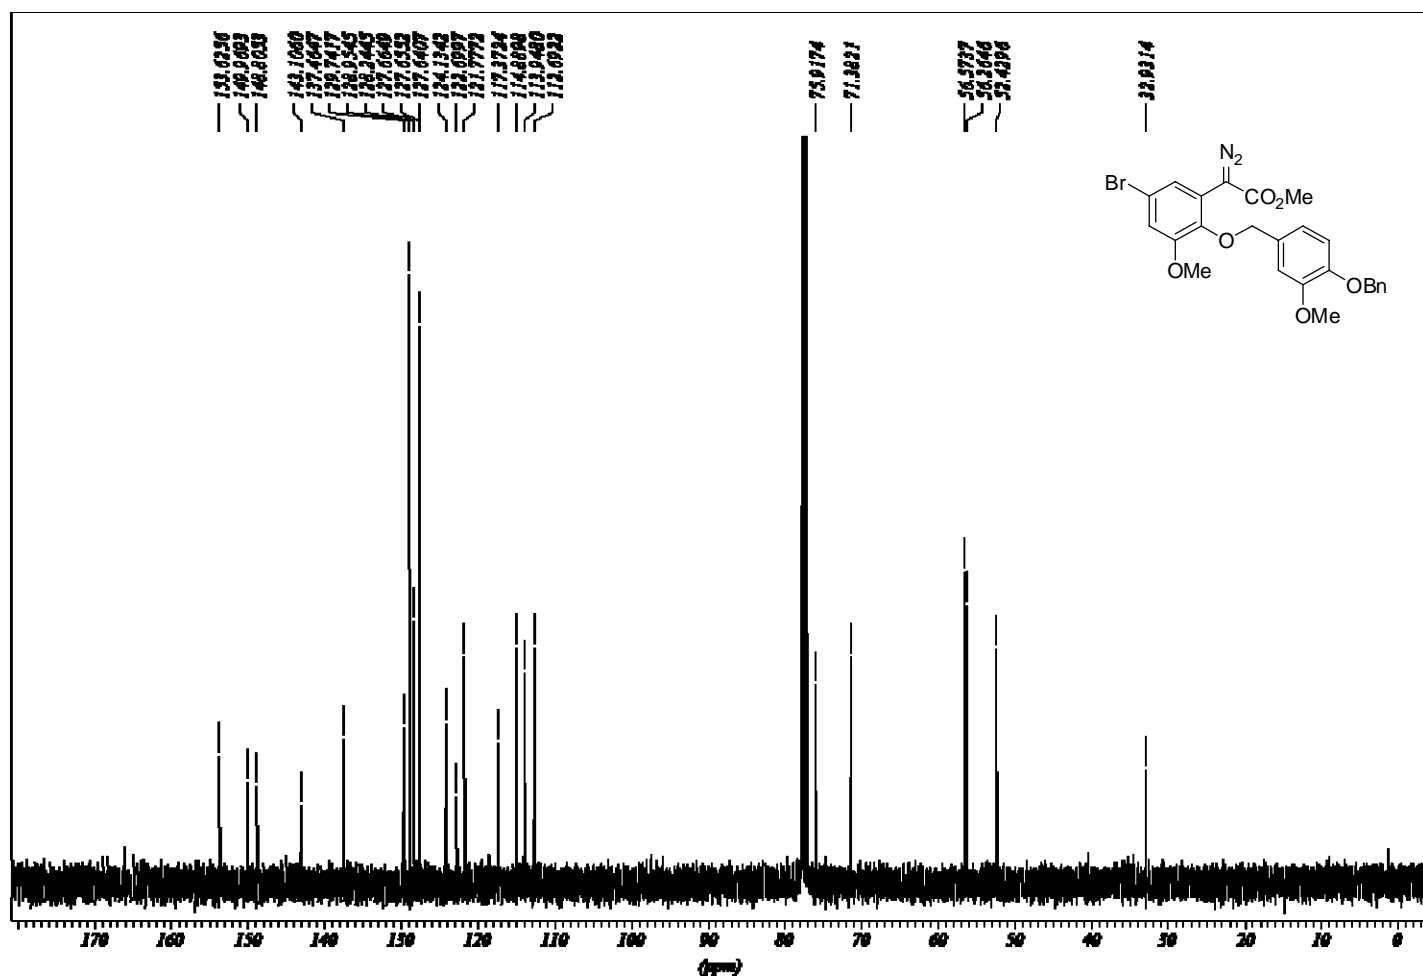

$^{13}\text{C}$  NMR (100.5 MHz,  $\text{CDCl}_3$ ) for:

*rac*-Methyl-2-(4-(benzyloxy)-3-methoxyphenyl)-5-bromo-7-methoxy-(2,3-*cis*)-dihydro benzofuran-3-carboxylate (*rac-cis-14*)

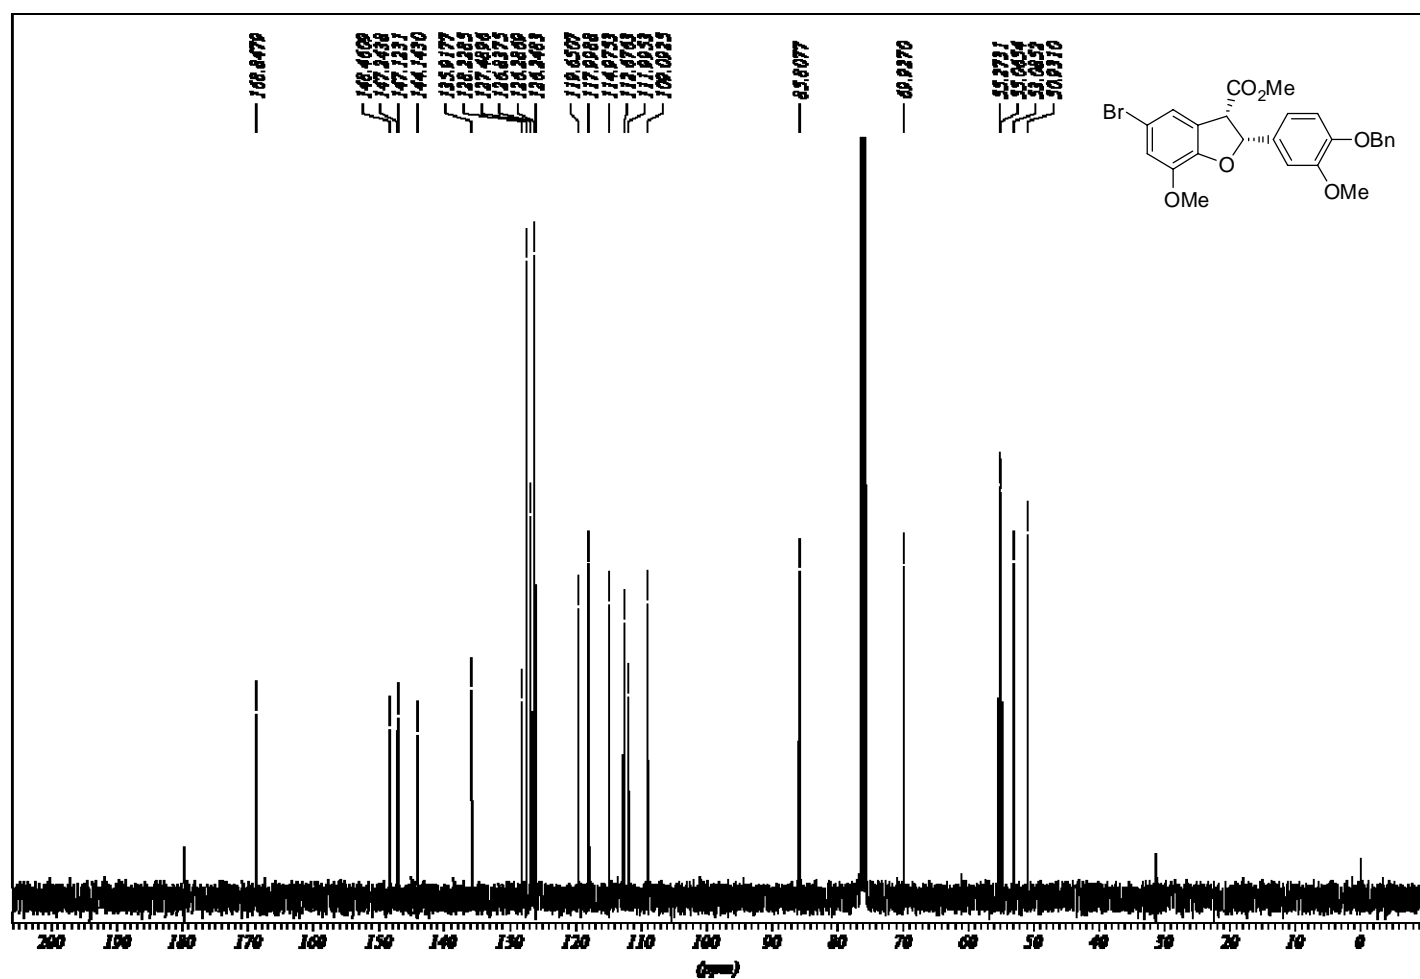

$^{13}\text{C}$  NMR (100.5 MHz,  $\text{CDCl}_3$ ) for:

*rac*-Methyl-2-(4-(benzyloxy)-3-methoxyphenyl)-5-bromo-7-methoxy-(2,3-*trans*)-dihydro benzofuran-3-carboxylate (*rac-trans*-14)

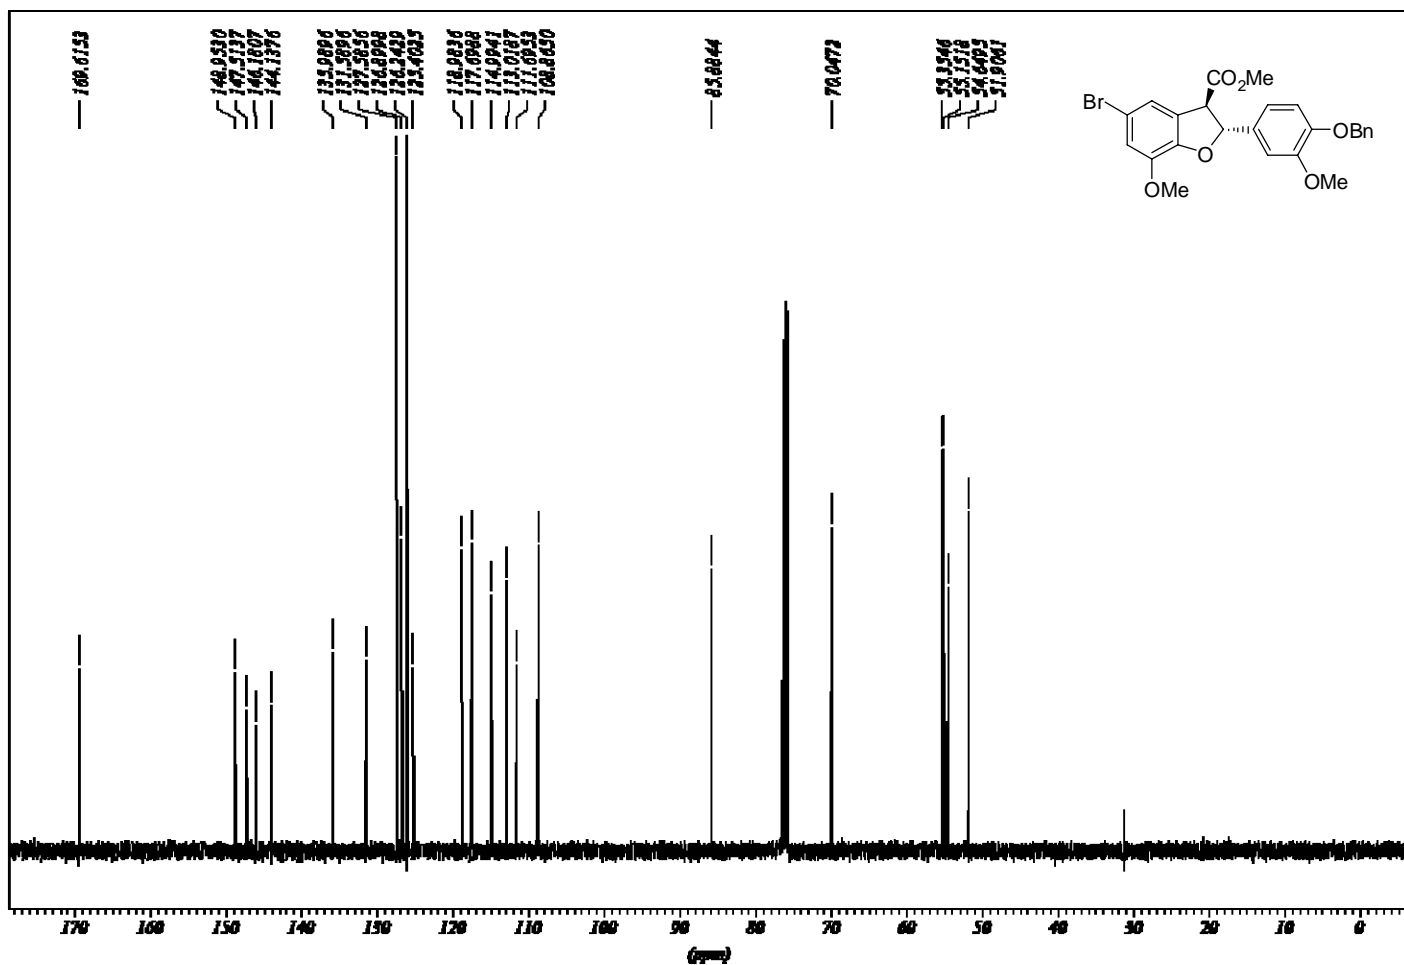

$^{13}\text{C}$  NMR (100.5 MHz,  $\text{CDCl}_3$ ) for:

*rac*-Methyl-2-(4-(benzyloxy)-3-methoxyphenyl)-5-(3-(benzyloxy)prop-1-ynyl)-7-methoxy-(2,3-*trans*)-dihydrobenzofuran-3-carboxylate (**16**)

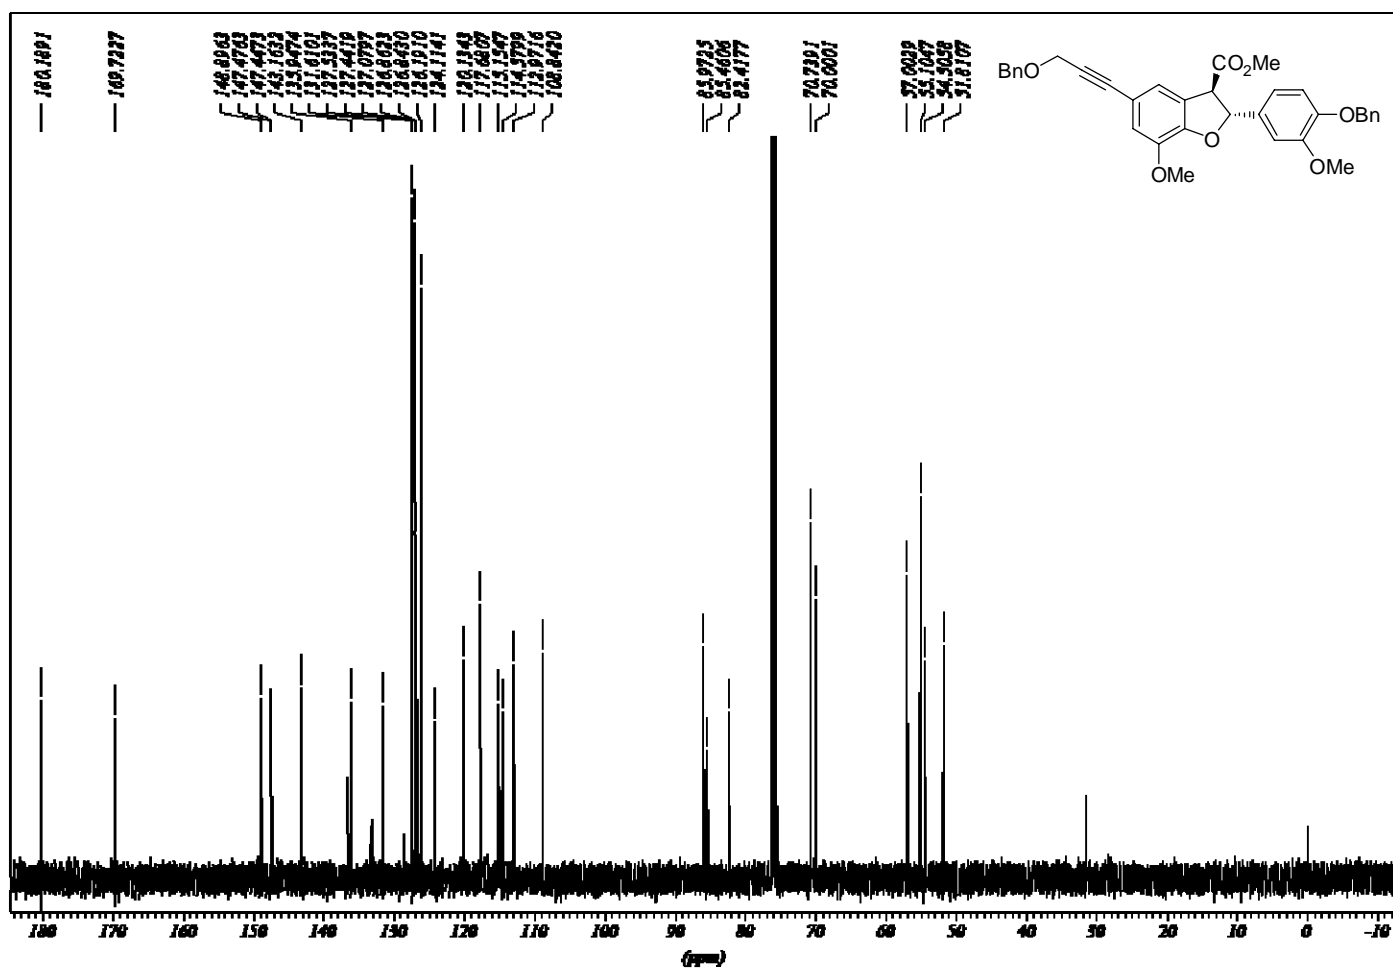

$^{13}\text{C}$  NMR (100.5 MHz,  $\text{CDCl}_3$ ) for:

*rac*-Methyl-(2,3-*trans*)-5-(3-hydroxypropyl)-2-(4-hydroxy-3-methoxyphenyl)-7-methoxy-2,3-dihydro-1-benzofuran-3-carboxylate (**20**)

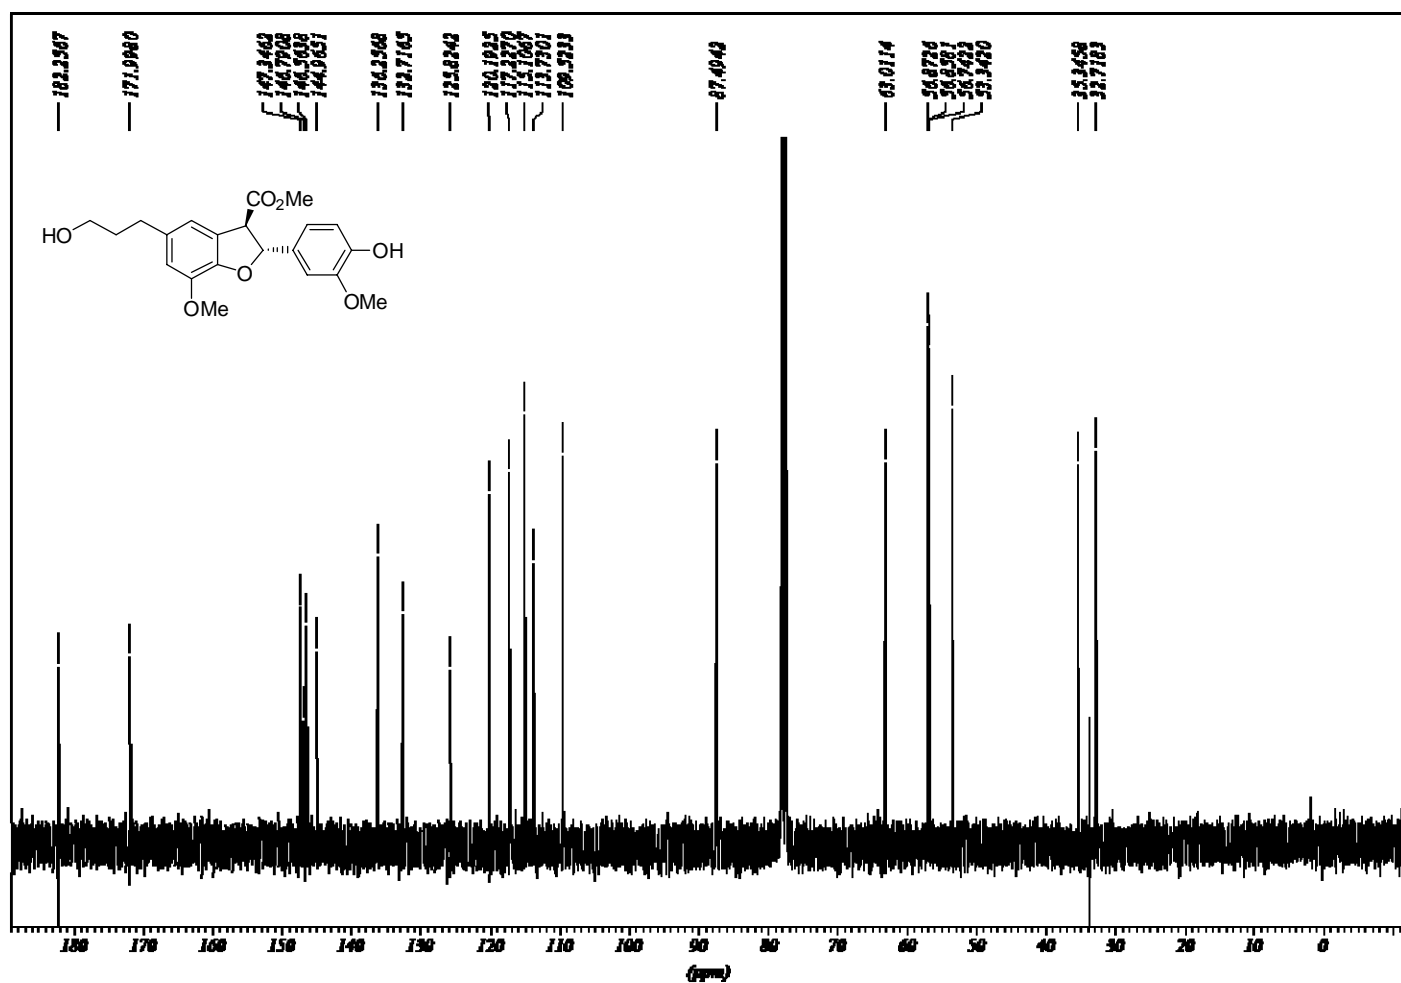

$^{13}\text{C}$  NMR (100.5 MHz,  $\text{CDCl}_3$ ) for:  
10:3 (*rac*-2,3-*trans*:*rac*-2,3-*cis*) dihydrodehydroconiferyl alcohol (**2**)

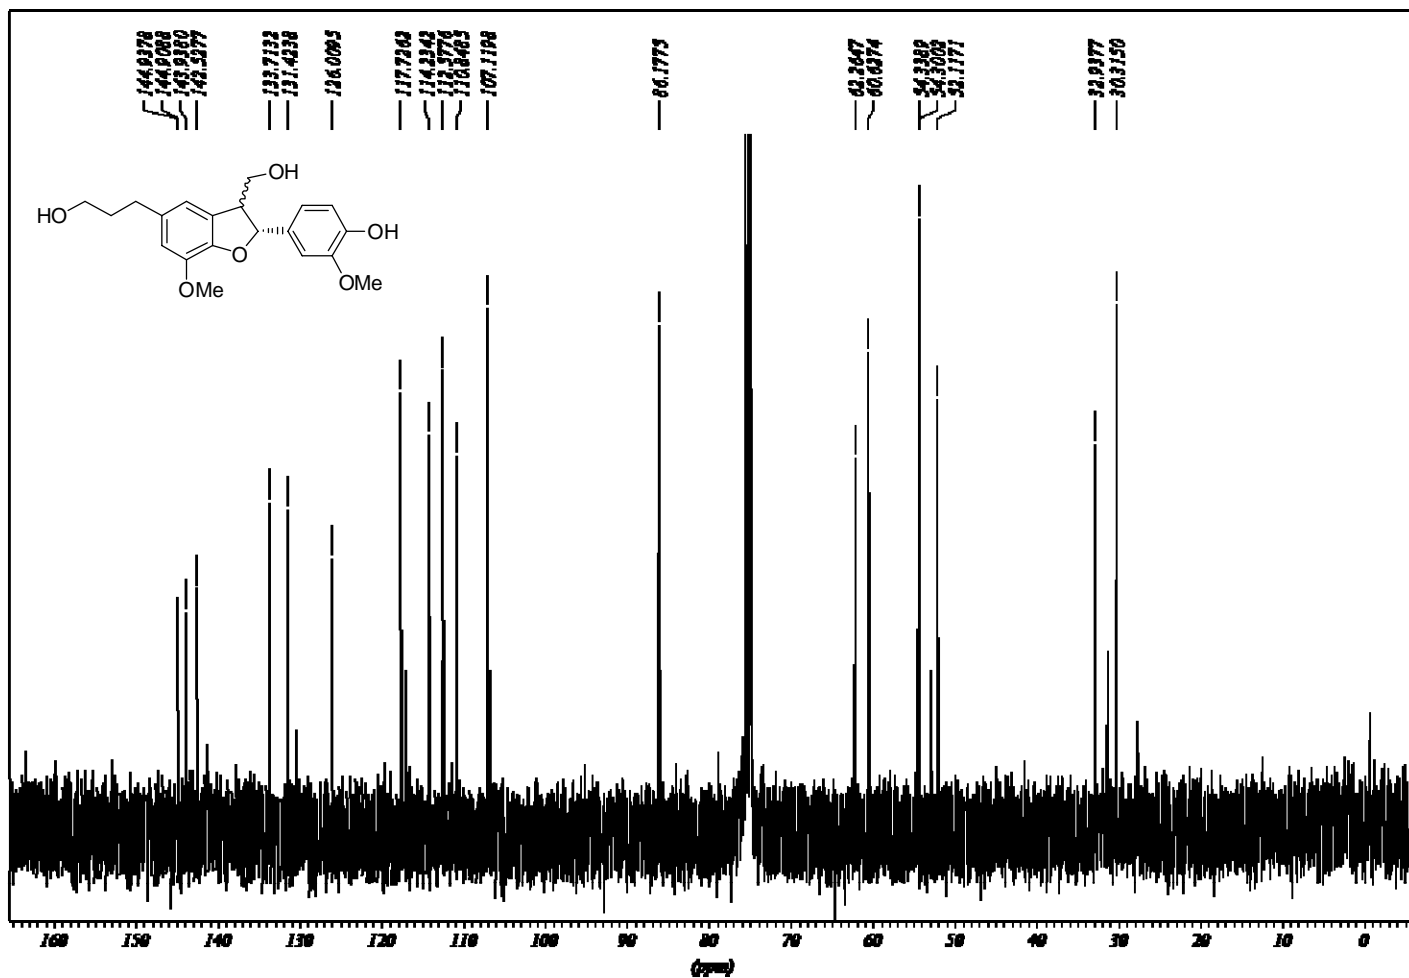

<sup>13</sup>C NMR (125 MHz, CDCl<sub>3</sub>) for: isolated natural product (lawsonicin)

Current Data Parameters  
NAME maj20  
EXPNO 5  
PROCNO 1

F2 - Acquisition Parameters  
Date 100521  
Time 5.26  
PULPROG zgpg  
SOLVENT CDCl3  
AQ 0.5143660 sec  
FIDRES 0.953674 Hz  
DQ 16.0 usec  
RG 32768  
NUCLEUS 13C  
D11 0.630000 sec  
S2 20 dB  
HL1 20 dB  
D1 1.500000 sec  
P1 8.2 usec  
DE 20.0 usec  
SF01 125.7734922 MHz  
SWH 31250.00 Hz  
TD 32768  
NS 40575  
DS 0

F2 - Processing parameters  
SI 32768  
SF 125.7591502 MHz  
WDW EM  
SSB 0  
LB 2.00 Hz  
GB 0  
PC 1.00

1D NMR plot parameters  
CX 22.10 cm  
F1P 219.903 ppm  
F1 27655.54 Hz  
F2P 1.110 ppm  
F2 139.54 Hz  
PPMCH 3.96043 ppm/  
HZCM 1245.06799 Hz/C1

NADEEM KARDAR/DR. BINA/LA-30/CDCL3

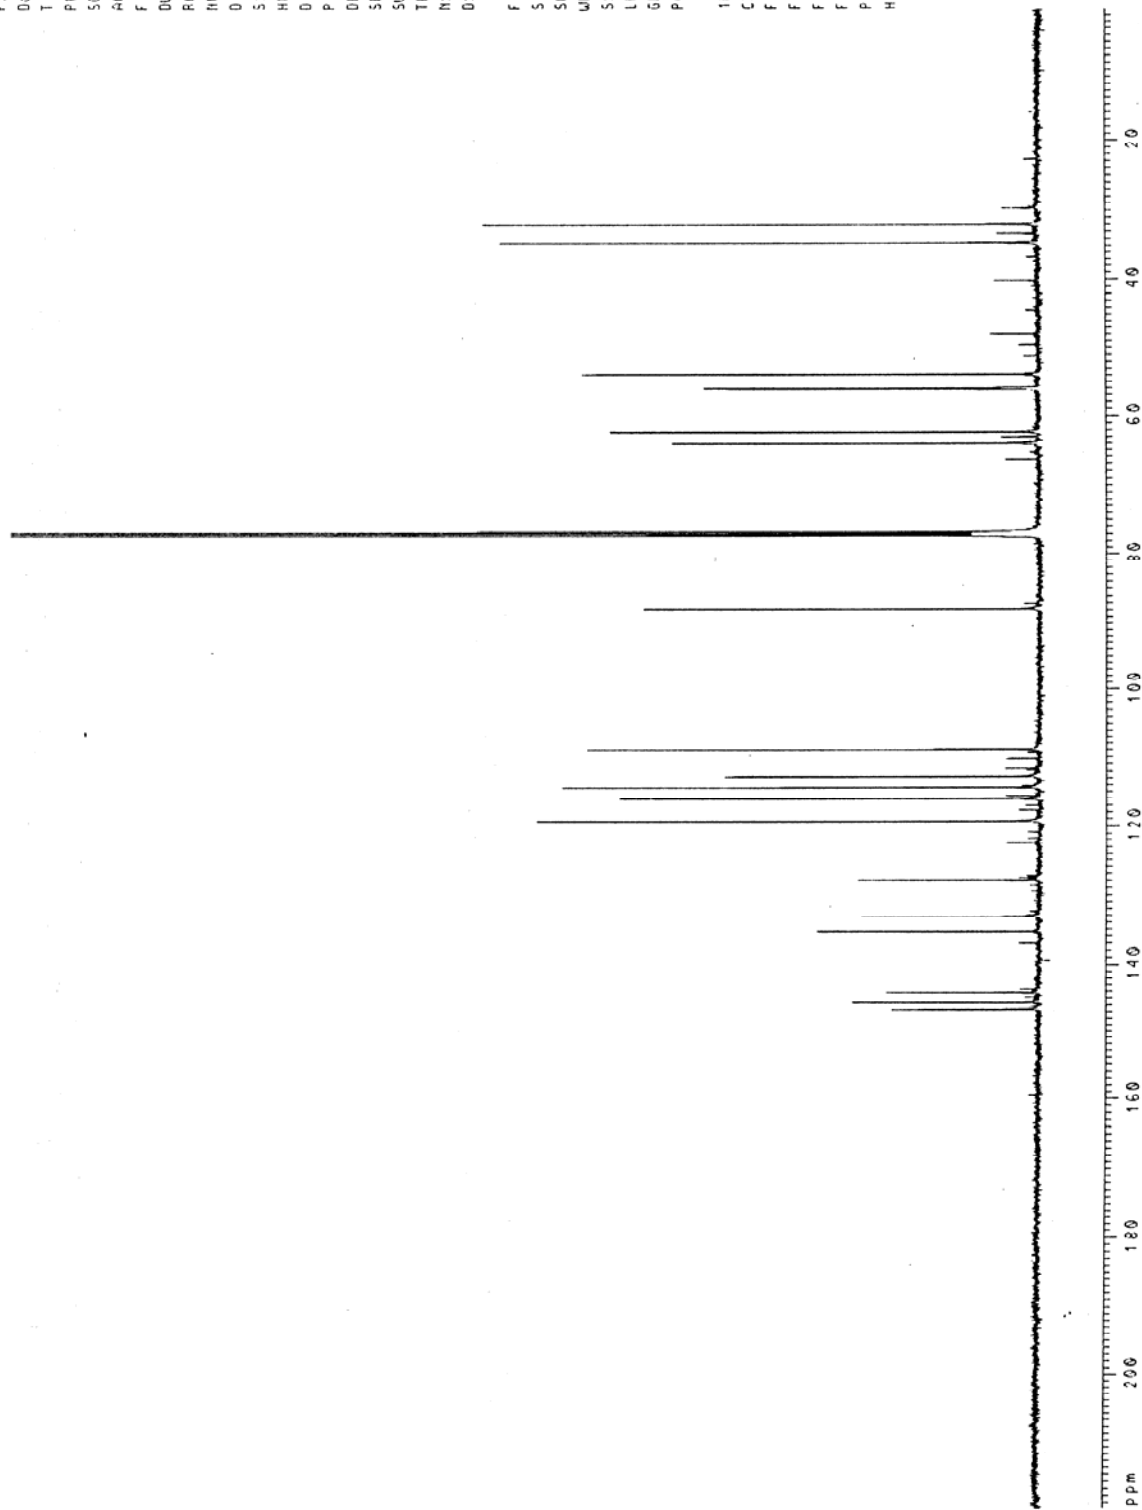

Supplement: b918179b.pdf [file b918179b.pdf]
